# Supplementary material
Source: publisher figshare collection journal article supplement (https://frontiersin.figshare.com/ndownloader/files/24493169)

## Sample clustering to detect outliers\_BM

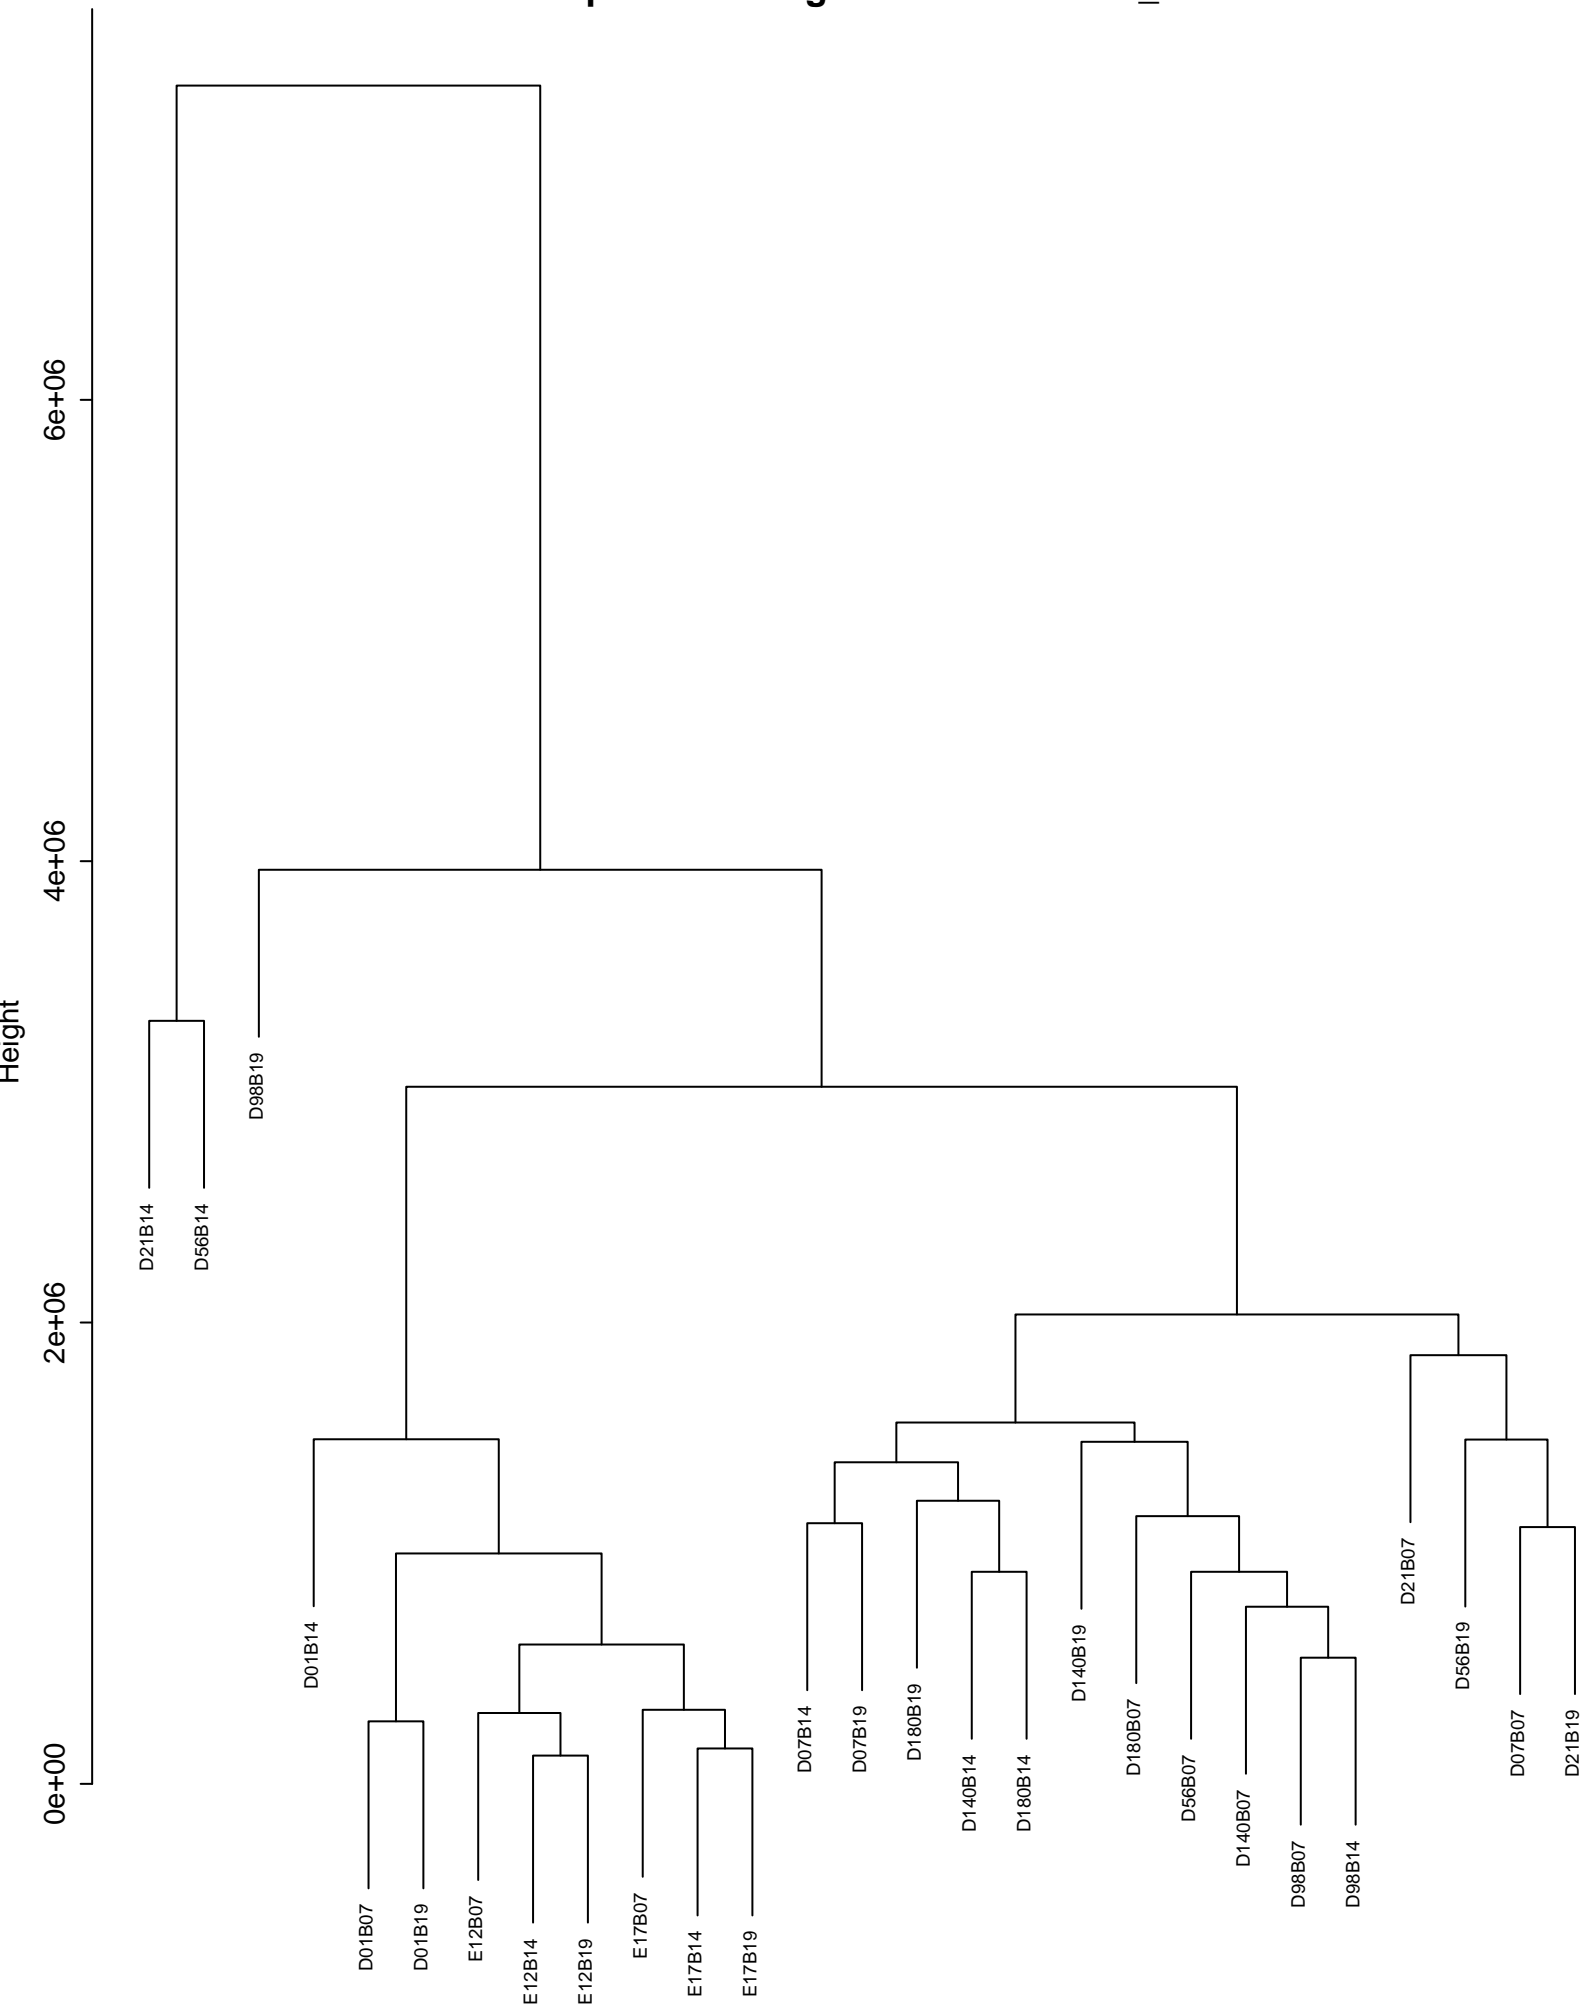

Supplement: Supplementary file [file 24493169]
